# Supplementary material
Source: PubMed Central journal article supplement (PMC7238404)
Supplement: Supplementary_Data.pdf [file Supplementary_Data.pdf]

Table SI. Clinicopathological characteristics.

| Patient ID | Sex | Age, years | Location   | TNM stage | Lymph node metastasis | Distal metastasis | Colonic polyp history |
|------------|-----|------------|------------|-----------|-----------------------|-------------------|-----------------------|
| 42         | M   | 72         | Rectum     | I         | No                    | No                | Yes                   |
| 9          | M   | 66         | Rectum     | II        | No                    | No                | No                    |
| 85         | M   | 69         | Rectum     | II        | No                    | Liver             | Yes                   |
| 10         | M   | 67         | Rectum     | IV        | 2a                    | No                | No                    |
| 32         | M   | 14         | Rectum     | III       | No                    | No                | No                    |
| 106        | M   | 73         | Rectum     | III       | No                    | No                | No                    |
| 51         | M   | 78         | Sigmoid    | III       | No                    | No                | No                    |
| 30         | M   | 85         | Rectum     | IV        | No                    | No                | No                    |
| 45         | M   | 79         | Rectum     | IV        | No                    | No                | Yes                   |
| 81         | M   | 71         | Ascending  | IV        | No                    | No                | No                    |
| 65         | M   | 87         | Rectum     | IV        | No                    | No                | No                    |
| 75         | M   | 67         | Rectum     | IV        | No                    | No                | No                    |
| 104        | M   | 63         | Rectum     | IV        | No                    | No                | Yes                   |
| 1          | M   | 59         | Ascending  | IVa       | No                    | No                | No                    |
| 56         | M   | 77         | Sigmoid    | IV        | No                    | No                | Yes                   |
| 63         | M   | 57         | Rectum     | III       | 1b                    | No                | Yes                   |
| 53         | M   | 72         | Rectum     | III       | 1                     | No                | No                    |
| 115        | M   | 54         | Cecum      | III       | 2a                    | Lung              | Yes                   |
| 15         | M   | 70         | Rectum     | IV        | 1a                    | No                | No                    |
| 41         | M   | 55         | Ascending  | IV        | 1b                    | -                 | -                     |
| 100        | M   | 75         | Ascending  | IV        | 1a                    | No                | No                    |
| 105        | M   | 41         | Ascending  | IV        | 1b                    | No                | No                    |
| 48         | M   | 66         | Rectum     | IV        | 1                     | No                | No                    |
| 84         | M   | 82         | Rectum     | IV        | 1b                    | No                | Yes                   |
| 91         | M   | 78         | Rectum     | IV        | 1a                    | Liver             | Yes                   |
| 98         | M   | 71         | Rectum     | IV        | 1a                    | No                | No                    |
| 49         | M   | 60         | Descending | IV        | 1                     | No                | No                    |
| 2          | M   | 45         | Sigmoid    | IVa       | 1                     | No                | No                    |
| 46         | M   | 68         | Rectum     | IV        | 2a                    | No                | No                    |
| 68         | M   | 79         | Rectum     | IV        | 2a                    | No                | No                    |
| 101        | M   | 71         | Sigmoid    | IV        | 2b                    | No                | No                    |
| 31         | M   | 45         | Transverse | IV        | 2b                    | -                 | -                     |
| 96         | M   | 72         | Transverse | IV        | 2a                    | No                | No                    |
| 54         | M   | 60         | Colon      | IV        | 2b                    | No                | No                    |
| 94         | M   | 57         | Rectum     | I         | No                    | No                | No                    |
| 26         | M   | 59         | Rectum     | II        | No                    | No                | Yes                   |
| 38         | M   | 56         | Rectum     | II        | No                    | -                 | -                     |
| 88         | M   | 63         | Rectum     | II        | No                    | No                | Yes                   |
| 24         | M   | 71         | Rectum     | III       | No                    | No                | Yes                   |
| 5          | M   | 61         | Ascending  | III       | No                    | No                | Yes                   |
| 109        | M   | 65         | Ascending  | III       | No                    | No                | Yes                   |
| 40         | M   | 63         | Colon      | III       | No                    | -                 | -                     |
| 36         | M   | 71         | Ascending  | III       | No                    | No                | No                    |
| 44         | M   | 71         | Ascending  | III       | No                    | -                 | -                     |
| 18         | M   | 65         | Transverse | III       | No                    | No                | No                    |
| 111        | M   | 61         | Rectum     | III       | No                    | No                | No                    |
| 50         | M   | 66         | Ascending  | III       | No                    | No                | No                    |
| 12         | M   | 72         | Rectum     | III       | No                    | No                | Yes                   |
| 6          | M   | 67         | Rectum     | IV        | No                    | No                | No                    |
| 25         | M   | 70         | Rectum     | IV        | No                    | No                | Yes                   |
| 79         | M   | 68         | Rectum     | IV        | No                    | Lung              | Yes                   |
| 86         | M   | 71         | Rectum     | IV        | No                    | No                | No                    |
| 11         | M   | 61         | Sigmoid    | IV        | No                    | No                | Yes                   |
| 52         | M   | 63         | Ascending  | IV        | No                    | No                | Yes                   |
| 69         | M   | 76         | Ascending  | IV        | No                    | No                | No                    |
| 80         | M   | 65         | Ascending  | IV        | No                    | No                | Yes                   |
| 110        | M   | 61         | Ascending  | IV        | No                    | No                | No                    |
| 8          | M   | 64         | Rectum     | IVa       | No                    | No                | No                    |

Table SI. Continued.

| Patient ID | Sex | Age, years | Location   | TNM stage | Lymph node metastasis | Distal metastasis | Colonic polyp history |
|------------|-----|------------|------------|-----------|-----------------------|-------------------|-----------------------|
| 55         | M   | 60         | Rectum     | IV        | No                    | Liver             | No                    |
| 20         | M   | 57         | Rectum     | II        | 1                     | No                | No                    |
| 22         | M   | 58         | Rectum     | II        | 1                     | No                | No                    |
| 23         | M   | 66         | Rectum     | III       | No                    | No                | Yes                   |
| 3          | M   | 68         | Rectum     | III       | 2a                    | -                 | -                     |
| 87         | M   | 63         | Rectum     | III       | 2a                    | No                | Yes                   |
| 82         | M   | 51         | Ascending  | III       | No                    | No                | No                    |
| 74         | M   | 65         | Descending | III       | 1a                    | No                | Yes                   |
| 13         | M   | 62         | Rectum     | IV        | 1a                    | No                | Yes                   |
| 19         | M   | 79         | Rectum     | IV        | 1a                    | No                | Yes                   |
| 21         | M   | 74         | Rectum     | IV        | 1c                    | No                | Yes                   |
| 92         | M   | 77         | Rectum     | IV        | 1a                    | Liver             | No                    |
| 97         | M   | 59         | Rectum     | IV        | 1a                    | -                 | -                     |
| 116        | M   | 69         | Rectum     | IV        | 1b                    | No                | Yes                   |
| 73         | M   | 59         | Sigmoid    | IV        | 1a                    | No                | Yes                   |
| 71         | M   | 62         | Ascending  | IV        | 1a                    | No                | No                    |
| 95         | M   | 75         | Transverse | IV        | 1c                    | No                | No                    |
| 62         | M   | 60         | Rectum     | IV        | 2b                    | Liver             | No                    |
| 113        | M   | 42         | Rectum     | IV        | 2a                    | No                | No                    |
| 72         | M   | 62         | Rectum     | IV        | 1a                    | No                | No                    |
| 7          | F   | 48         | Rectum     | I         | No                    | No                | No                    |
| 103        | F   | 58         | Rectum     | III       | No                    | No                | No                    |
| 99         | F   | 57         | Ascending  | III       | No                    | No                | Yes                   |
| 89         | F   | 67         | Transverse | IV        | No                    | No                | No                    |
| 102        | F   | 76         | Rectum     | IV        | No                    | No                | No                    |
| 17         | F   | 73         | Colon      | IV        | No                    | No                | No                    |
| 114        | F   | 66         | Rectum     | IV        | 1b                    | No                | Yes                   |
| 83         | F   | 69         | Ascending  | IV        | 1a                    | No                | No                    |
| 37         | F   | 67         | Transverse | IV        | 1                     | -                 | -                     |
| 78         | F   | 64         | Transverse | IV        | 1b                    | Abdomen           | No                    |
| 43         | F   | 48         | Rectum     | III       | 2b                    | No                | No                    |
| 67         | F   | 42         | Rectum     | IV        | 2b                    | No                | No                    |
| 77         | F   | 46         | Rectum     | IV        | 2b                    | No                | No                    |
| 112        | F   | 48         | Rectum     | IV        | 2b                    | No                | No                    |
| 90         | F   | 63         | Rectum     | I         | No                    | No                | No                    |
| 14         | F   | 59         | Sigmoid    | I         | No                    | No                | Yes                   |
| 61         | F   | 49         | Rectum     | II        | No                    | No                | No                    |
| 64         | F   | 37         | Rectum     | II        | No                    | No                | No                    |
| 117        | F   | 74         | Rectum     | III       | No                    | No                | No                    |
| 33         | F   | 61         | Cecum      | III       | No                    | No                | Yes                   |
| 70         | F   | 64         | Transverse | III       | No                    | No                | No                    |
| 35         | F   | 58         | Rectum     | IV        | No                    | No                | Yes                   |
| 76         | F   | 56         | Rectum     | IV        | No                    | No                | No                    |
| 39         | F   | 57         | Sigmoid    | IV        | No                    | -                 | -                     |
| 66         | F   | 57         | Ascending  | IV        | No                    | No                | No                    |
| 93         | F   | 69         | Ascending  | IV        | No                    | -                 | -                     |
| 107        | F   | 50         | Ascending  | IV        | No                    | No                | No                    |
| 16         | F   | 73         | Colon      | IV        | No                    | Liver             | Yes                   |
| 29         | F   | 54         | Rectum     | IV        | No                    | No                | No                    |
| 108        | F   | 72         | Ascending  | IV        | No                    | No                | No                    |
| 57         | F   | 57         | Ascending  | IV        | No                    | No                | Yes                   |
| 34         | F   | 45         | Rectum     | III       | 1                     | -                 | -                     |
| 58         | F   | 87         | Sigmoid    | IV        | 1a                    | No                | No                    |
| 27         | F   | 73         | Ascending  | IV        | 1                     | -                 | -                     |
| 47         | F   | 71         | Ascending  | IV        | 1                     | No                | No                    |
| 60         | F   | 76         | Transverse | IV        | 1b                    | No                | No                    |
| 4          | F   | 68         | Ascending  | IVa       | 1                     | No                | Yes                   |
| 59         | F   | 42         | Sigmoid    | IV        | 2a                    | No                | No                    |

Table SI. Continued.

| Patient ID | Sex | Age, years | Location | TNM stage | Lymph node metastasis | Distal metastasis | Colonic polyp history |
|------------|-----|------------|----------|-----------|-----------------------|-------------------|-----------------------|
| 28         | F   | 66         | Colon    | -         | -                     | -                 | -                     |

M, male; F, female; TNM, Tumor-Node-Metastasis staging system.



Table SII. Continued.

| Patient ID | APC<br>mt | BRAF<br>mt | CDKN2A<br>mt | EGFR<br>mt | FBXW7<br>mt | IDH1<br>mt | KIT<br>mt | KRAS<br>mt | MET<br>mt | MLH1<br>mt | PIK3CA<br>mt | PTEN<br>mt | SMAD4<br>mt | STK11<br>mt | TP53<br>mt |
|------------|-----------|------------|--------------|------------|-------------|------------|-----------|------------|-----------|------------|--------------|------------|-------------|-------------|------------|
| 24         |           |            | 1            |            |             |            | 1         |            |           |            |              |            | 1           | 1           | 1          |
| 5          | 1         |            |              |            |             |            |           | 1          |           |            |              |            |             |             |            |
| 109        |           |            |              |            |             |            |           |            |           |            |              |            |             |             | 1          |
| 40         | 1         |            |              | 1          |             |            |           | 1          | 1         |            |              | 1          |             |             | 1          |
| 36         |           |            |              |            |             |            |           | 1          |           |            | 1            |            |             |             | 1          |
| 44         | 1         |            |              |            |             |            |           | 1          |           |            |              |            |             |             | 1          |
| 18         |           |            |              |            |             |            |           |            |           |            |              |            |             | 1           |            |
| 111        | 1         |            |              |            | 1           |            |           | 1          |           |            |              |            |             |             |            |
| 50         | 1         |            |              |            |             |            |           | 1          |           |            |              |            |             |             |            |
| 12         |           |            | 1            |            |             |            |           | 1          |           |            |              |            |             |             |            |
| 6          |           |            | 1            |            |             |            |           | 1          |           |            |              |            |             |             |            |
| 25         |           | 1          |              |            |             |            | 1         |            |           |            | 1            |            |             |             | 1          |
| 79         | 1         |            |              | 1          |             |            | 1         |            |           |            | 1            |            |             | 1           | 1          |
| 86         | 1         |            | 1            |            |             | 1          | 1         | 1          | 1         |            | 1            |            |             | 1           | 1          |
| 11         | 1         |            | 1            |            | 1           |            | 1         | 1          |           |            |              |            | 1           | 1           | 1          |
| 52         | 1         |            | 1            |            |             |            |           | 1          | 1         |            |              |            | 1           |             | 1          |
| 69         | 1         |            | 1            |            |             |            | 1         | 1          | 1         |            |              |            | 1           |             | 1          |
| 80         |           | 1          |              | 1          |             |            | 1         |            |           |            |              |            |             |             | 1          |
| 110        | 1         |            |              |            |             |            |           | 1          |           | 1          |              |            |             |             |            |
| 8          | 1         |            |              |            |             |            |           |            |           | 1          |              |            |             |             |            |
| 55         | 1         |            |              |            |             |            | 1         |            | 1         |            |              |            |             |             | 1          |
| 20         |           |            |              |            |             | 1          | 1         |            |           |            |              |            |             |             |            |
| 22         | 1         |            |              |            |             |            |           | 1          |           |            |              |            |             |             |            |
| 23         |           |            |              |            |             |            |           |            |           |            |              |            |             |             |            |
| 3          |           |            |              |            |             |            |           |            |           |            |              |            |             |             |            |
| 87         | 1         |            |              |            | 1           |            |           | 1          | 1         |            |              | 1          | 1           | 1           | 1          |
| 82         |           |            |              | 1          |             |            |           |            | 1         |            | 1            |            |             | 1           | 1          |
| 74         | 1         |            |              |            | 1           |            | 1         | 1          |           | 1          | 1            |            |             | 1           | 1          |
| 13         | 1         |            |              |            |             |            | 1         | 1          |           | 1          | 1            | 1          |             |             | 1          |
| 19         |           |            |              |            |             | 1          |           | 1          |           |            |              |            |             |             | 1          |
| 21         | 1         |            |              |            |             |            |           |            |           |            |              |            |             | 1           | 1          |
| 92         | 1         |            |              |            |             |            | 1         |            |           |            | 1            | 1          |             | 1           | 1          |
| 97         | 1         |            |              |            | 1           |            |           | 1          |           |            |              |            |             | 1           | 1          |
| 116        |           |            |              |            | 1           |            |           |            |           |            |              |            |             |             | 1          |
| 73         |           |            |              | 1          |             |            |           |            |           |            | 1            |            |             |             | 1          |
| 71         |           |            |              |            |             |            |           | 1          |           |            | 1            |            |             |             | 1          |
| 95         |           |            |              |            |             |            |           |            |           |            |              |            |             |             | 1          |
| 62         | 1         |            |              |            | 1           |            |           |            | 1         |            |              |            |             | 1           | 1          |



Table SII. Continued.

| Patient ID | APC | BRAF | CDKN2A | EGFR | FBXW7 | IDH1 | KIT | KRAS | MET | MLH1 | PIK3CA | PTEN | SMAD4 | STK11 | TP53 |    |
|------------|-----|------|--------|------|-------|------|-----|------|-----|------|--------|------|-------|-------|------|----|
|            | mt  | mt   | mt     | mt   | mt    | mt   | mt  | mt   | mt  | mt   | mt     | mt   | mt    | mt    | mt   |    |
| 4          | 1   |      | 1      |      |       |      |     | 1    |     |      |        |      |       |       |      | mt |
| 59         |     |      | 1      |      |       |      |     | 1    |     |      |        |      |       |       |      | 1  |
| 28         |     |      | 1      |      |       |      |     |      |     |      |        |      |       | 1     |      | 1  |
